# Supplementary material
Source: PubMed Central journal article supplement (PMC7875715)
Supplement: mmc1.pdf [file mmc1.pdf]

**Supplementary Table 1: Admitted patient echocardiography findings, and laboratory parameters in relation to intubation and expiration**

| Variables                           | Admitted patients (n=180) | Outcomes              |                   |                  |                   |                   |                  |
|-------------------------------------|---------------------------|-----------------------|-------------------|------------------|-------------------|-------------------|------------------|
|                                     |                           | Not intubated (n=126) | Intubated (n=54)  | P-value          | No death (n=121)  | Death (n=59)      | P-value          |
| <b>Encounter Location (%)</b>       |                           |                       |                   | 0.89             |                   |                   | 0.50             |
| <b>Manhattan</b>                    | 57 (32)                   | 39 (31)               | 18 (33)           |                  | 41 (34)           | 16 (27)           |                  |
| <b>Brooklyn</b>                     | 108 (60)                  | 77 (61)               | 31 (57)           |                  | 69 (57)           | 39 (66)           |                  |
| <b>Queens</b>                       | 15 (8.3)                  | 10 (7.9)              | 5 (9.3)           |                  | 11 (9.1)          | 4 (6.8)           |                  |
| <b>Laboratory parameters [IQR]</b>  |                           |                       |                   |                  |                   |                   |                  |
| <b>Procalcitonin median (ng/mL)</b> | 0.51 [0.17, 2.6]          | 0.32 [0.12, 1.6]      | 1.7 [0.39, 11]    | <b>&lt;0.001</b> | 0.32 [0.12, 1.6]  | 1.53 [0.34, 5.7]  | <b>0.002</b>     |
| <b>Troponin median (ng/mL)</b>      | 0.05 [0.02, 0.19]         | 0.03 [0.02, 0.11]     | 0.18 [0.05, 0.35] | <b>&lt;0.001</b> | 0.03 [0.02, 0.11] | 0.16 [0.04, 0.44] | <b>&lt;0.001</b> |
| <b>BNP median (pg/mL)</b>           | 93 [38, 298]              | 104 [41, 303]         | 62 [35, 289]      | 0.39             | 74 [36, 213]      | 193 [56, 382]     | <b>0.03</b>      |
| <b>CKMB median (u/L)</b>            | 2.9 [1.5, 5.2]            | 1.8 [0.80, 3.0]       | 4.0 [2.3, 6.8]    | <b>0.02</b>      | 2.9 [1.2, 4.0]    | 4.2 [1.7, 6.6]    | 0.12             |
| <b>ALT median (u/L)</b>             | 47 [23, 83]               | 35 [20, 70]           | 73 [39, 156]      | <b>&lt;0.001</b> | 38 [20, 76]       | 54 [31, 118]      | <b>0.01</b>      |
| <b>AST median (u/L)</b>             | 58 [35, 117]              | 46 [30, 77]           | 118 [66, 167]     | <b>&lt;0.001</b> | 47 [30, 83]       | 92 [57, 157]      | <b>&lt;0.001</b> |
| <b>D-dimer median (ug/mL)</b>       | 4.8 [1.6, 12]             | 3.3 [1.3, 8.0]        | 9.3 [3.8, 15]     | <b>0.001</b>     | 4.1 [1.6, 8.3]    | 9.2 [2.0, 15]     | 0.09             |
| <b>AKI (%)</b>                      | 41 (23)                   | 24 (19)               | 17 (32)           | 0.1              | 21 (17)           | 20 (34)           | <b>0.02</b>      |
| <b>VTE (%)</b>                      | 7 (3.9)                   | 2 (1.6)               | 5 (9.3)           | <b>0.04</b>      | 4 (3.3)           | 3 (5.1)           | 0.87             |
| <b>Echo findings (n=91)</b>         |                           |                       |                   |                  |                   |                   |                  |
| <b>LVEF median [IQR]</b>            | 60 [53, 66]               | 60 [53, 65]           | 61 [54, 67]       | 0.59             | 59 [52, 65]       | 60 [55, 67]       | 0.55             |
| <b>RV size (% normal)</b>           | 78/91 (86)                | 48/56 (86)            | 30/35 (86)        | 1                | 45/54 (83)        | 33/37 (89)        | 0.63             |
| <b>LV size (%)</b>                  |                           |                       |                   | 0.51             |                   |                   | 0.96             |
| <b>Dilated</b>                      | 7/91 (7.7)                | 3/56 (5.4)            | 4/35 (11)         |                  | 4/54 (7.4)        | 3/37 (8.1)        |                  |
| <b>Normal</b>                       | 82/91 (90)                | 51/56 (91)            | 31/35 (89)        |                  | 49/54 (91)        | 33/37 (89)        |                  |
| <b>Reduced</b>                      | 2/91 (2.2)                | 2/56 (3.6)            | 0/35 (0.0)        |                  | 1/54 (1.9)        | 1/37 (2.7)        |                  |

Categorical variables are expressed as counts and percentages. Continuous variables are expressed as medians with interquartile ranges (IQR). Significant p-values ( $\leq 0.05$ ) are bolded. Venous thromboembolic events (VTE) defined by radiographic evidence. Right ventricular (RV) and left ventricular (LV) sizes categorized according to echocardiographic report by board-certified cardiologists. BNP=brain natriuretic peptide; CKMB= creatine kinase myocardial band; ALT=alanine aminotransferase; AST=aspartate aminotransferase; AKI=acute kidney injury; VTE=venous thromboembolic event; LVEF=left ventricular ejection fraction; RV=right ventricle; LV=left ventricle.
